# Supplementary material
Source: ML conference proceedings conference paper supplement (https://proceedings.neurips.cc/paper_files/paper/2022/hash/ca2963d1cfb25e93362e86fb427a9524-Abstract.html)
Supplement: Supplementary file 1 [file ca2963d1cfb25e93362e86fb427a9524-Supplemental-Conference.pdf]

---

# A supplementary for the paper

## Falconn++: A Locality-sensitive Filtering Approach for Approximate Nearest Neighbor Search

---

**Ninh Pham**  
School of Computer Science  
University of Auckland  
ninh.pham@auckland.ac.nz

**Tao Liu**  
School of Computer Science  
University of Auckland  
tliu137@aucklanduni.ac.nz

### 1 Proof of Theorem 1

**Theorem 1.** *Given sufficiently large  $D$  random vectors and  $c > 1$ , the filtering mechanism described in the paper has the following properties:*

- If  $\|\mathbf{x} - \mathbf{q}\| \leq r$ , then  $\Pr[\mathbf{x} \text{ is not filtered}] \geq q_1 = 1/2$ ;
- If  $\|\mathbf{y} - \mathbf{q}\| \geq cr$ , then  $\Pr[\mathbf{y} \text{ is not filtered}] \leq q_2 = \frac{1}{\sqrt{2\pi}\gamma} \exp(-\gamma^2/2) < q_1$  where  

$$\gamma = \frac{cr(1-1/c^2)}{\sqrt{4-c^2r^2}} \cdot \sqrt{2 \ln D}.$$

*Proof.* We first show the two properties for the case  $\|\mathbf{x} - \mathbf{q}\| = r$ ,  $\|\mathbf{y} - \mathbf{q}\| = cr$  by analyzing the tail of Gaussian random variables  $X = \mathbf{x}^\top \mathbf{r}_1 \sim N(\mu_1, \sigma_1^2)$  and  $Y = \mathbf{y}^\top \mathbf{r}_1 \sim N(\mu_2, \sigma_2^2)$ , where

$$\begin{aligned}\mu_1 &= \mathbf{x}^\top \mathbf{q} \sqrt{2 \ln D} = (1 - r^2/2) \sqrt{2 \ln D}, \sigma_1^2 = 1 - (1 - r^2/2)^2, \\ \mu_2 &= \mathbf{y}^\top \mathbf{q} \sqrt{2 \ln D} = (1 - c^2r^2/2) \sqrt{2 \ln D}, \sigma_2^2 = 1 - (1 - c^2r^2/2)^2.\end{aligned}$$

We use the classic tail bound of normal random variables. If  $Z \sim N(0, 1)$ , then for any  $a > 0$ ,

$$\Pr[Z \geq a] \leq \frac{1}{a\sqrt{2\pi}} e^{-a^2/2}.$$

We define  $\Delta\mu = \mu_1 - \mu_2 > 0$  and set the threshold  $t = \mu_1 = (1 - r^2/2)\sqrt{2 \ln D}$ . Since  $X \sim N(\mu_1, \sigma_1^2)$  and  $t = \mu_1$ ,  $\Pr[X \geq t] = 1/2 = q_1$ . Applying the tail bound on  $Y \sim N(\mu_2, \sigma_2^2)$ ,

$$\Pr[Y \geq t] = \Pr\left[\frac{Y - \mu_2}{\sigma_2} \geq \frac{\Delta\mu}{\sigma_2}\right] \leq \frac{1}{\sqrt{2\pi}(\Delta\mu)/\sigma_2} \exp\left(-\frac{(\Delta\mu)^2}{2\sigma_2^2}\right) = \frac{1}{\sqrt{2\pi}\gamma} \exp(-\gamma^2/2) = q_2,$$

where  $\gamma = \Delta\mu/\sigma_2$ . Since  $\Delta\mu = \frac{c^2r^2}{2}(1 - \frac{1}{c^2})\sqrt{2 \ln D}$  and  $\sigma_2^2 = c^2r^2\left(1 - \frac{c^2r^2}{4}\right)$ , we have  

$$\gamma = \frac{cr(1-1/c^2)}{\sqrt{4-c^2r^2}} \cdot \sqrt{2 \ln D}.$$

Since  $\Delta\mu/\sigma_2$  is monotonic with respect to  $c$ , further points has a higher probability of being discarded. Therefore, the second property holds for any far away point  $\mathbf{y}$ , i.e.  $\|\mathbf{y} - \mathbf{q}\| \geq cr$ . The first property holds for any close point  $\mathbf{x}$ , i.e.  $\|\mathbf{x} - \mathbf{q}\| \leq r$ , since their projection value onto  $\mathbf{r}_1$  follows a Gaussian distribution with mean  $\mu \geq \mu_1$ .  $\square$

### 2 Falconn++ vs. theoretical LSF frameworks

Figure 1 shows the recall-speed comparison between Falconn++ and recent theoretical LSF frameworks [2, 3]. All 3 data sets use  $L = 100$ ,  $\alpha = \{0.1, 0.5\}$ ,  $iProbes = 1$ , and the centering trick. We

do not apply the limit scaling trick to ensure that both Falconn++ and the theoretical LSF approaches share the same number of points in a table. We use  $D = \{128, 256, 256\}$  for NYTimes, Glove200, and Glove300. With 2 LSH functions, each table of both approaches has the same  $4D^2$  buckets.

Given  $\alpha$ , Falconn++ simply keeps  $\alpha B$  points in a bucket of size  $B$  whose absolute dot products to the corresponding vector  $\mathbf{r}_i$  are the largest. To ensure that the table has  $\alpha n$  points, theoretical LSF computes the global threshold  $t_u$  such that it keeps  $\mathbf{x}$  in the bucket corresponding to  $\mathbf{r}_i$  with probability  $\alpha/4D^2$ . Since  $\mathbf{x}^\top \mathbf{r}_i \sim N(0, 1)$ , we use the `inverseCDF(.)` of a normal distribution to compute  $t_u$  such that  $\Pr[\mathbf{x}^\top \mathbf{r}_i \geq t_u]^2 = \alpha/4D^2$ . Given this setting, the theoretical LSF with pre-computed  $t_u$  has a similar number of indexed points as Falconn++.

Figure 1 shows superior performance of Falconn++ compared to the theoretical LSF with  $\alpha = \{0.1, 0.5\}$  on 3 data sets. Note that NYTimes has the center vector  $\mathbf{c} = \mathbf{0}$ , hence does not need centering. Figure 1(b) and (c) show that Falconn++ with centering trick can even improve the performance on Glove200 and Glove300, whereas theoretical LSF significantly decreases the performance with centering trick. This is because the LSF mechanism of Falconn++ can work on the general inner product (after centering the data points) while the theoretical LSF mechanism works on a unit sphere.

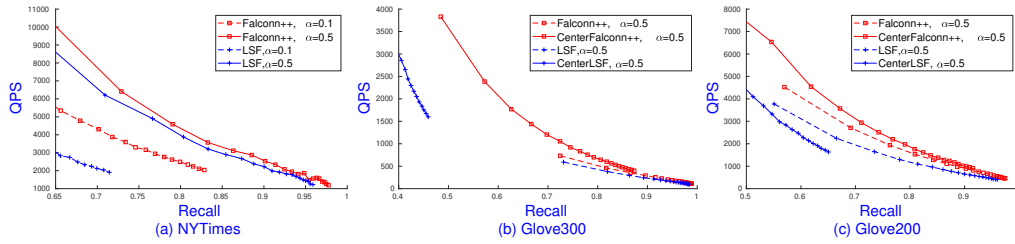

Figure 1: The recall-speed comparison between Falconn++ and theoretical LSF frameworks.

### 3 A heuristic to select parameter values for Falconn++

This section will present a heuristic to select parameters of Falconn++, including number of random vectors  $D$ , number of tables  $L$ , scale factor  $\alpha$ , and number of indexing probing  $iProbes$ .

Since Falconn++ uses 2 LSH functions, the number of buckets is  $4D^2$ . We apply the limit scaling trick to keep  $\max(k, \alpha B/iProbes)$  points in any bucket. Since we expect to see approximately  $k$  near neighbors in a bucket, this trick prevents scaling small buckets that might contain top- $k$  nearest neighbors. When applying  $iProbes$ , we expect the number of points in a table, i.e.  $n \cdot iProbes$ , will be distributed equally into  $4D^2$  buckets. Hence, each bucket has  $n \cdot iProbes/4D^2$  points in expectation.

We note that we would not want to use large  $iProbes$  since the bucket will tend to keep the points closest to the random vector  $\mathbf{r}_i$ , and therefore degrades the performance. Falconn++ with a large  $iProbes$  works similarly to the theoretical LSF framework [2, 3] which keeps the point  $\mathbf{x}$  in the bucket corresponding to  $\mathbf{r}_i$  such that  $\mathbf{x}^\top \mathbf{r}_i \geq t_u$  for a given threshold  $t_u$ . LSF frameworks need to use a large  $t_u$  so that a bucket will contain a small number of points to ensure the querying performance. Figure 1 shows Falconn++ with a *local* threshold  $t$  adaptive to the data in each bucket, outperforms the theoretical LSF frameworks that use a *global*  $t_u$  for all buckets.

The heuristic idea is that we select  $iProbes$  and  $D$  such that the bucket size has roughly  $k$  points in expectation by setting  $k \approx n \cdot iProbes/4D^2$ . For instance, on Glove200:  $n = 1M$ ,  $D = 256$ ,  $k = 20$ , each table has  $4D^2 = 2^{18}$  buckets. The setting  $iProbes = 3$ ,  $D = 256$  leads to  $1M \cdot 3/2^{18} = 2^4 = 16 < k = 20$  points in a bucket in expectation.

Falconn++ needs a sufficiently large  $D$  to maintain the LSF property. Since we deal with high dimensional data set with large  $d$ ,  $D \approx 2^{\lceil \log_2 d \rceil}$  is sufficient. Falconn++ with larger values of  $D$  and  $iProbes$  requires larger memory footprint but achieves higher recall-speed tradeoffs, as can be seen in Figure 2.

On NYTimes with  $n = 300K$ , we set  $L = 500$ ,  $D = \{128, 256\}$ ,  $iProbes = \{10, 40\}$ . On Glove200 with  $n = 1M$ , we set  $L = 350$ ,  $D = \{256, 512\}$ ,  $iProbes = \{3, 10\}$ . On Glove300 with

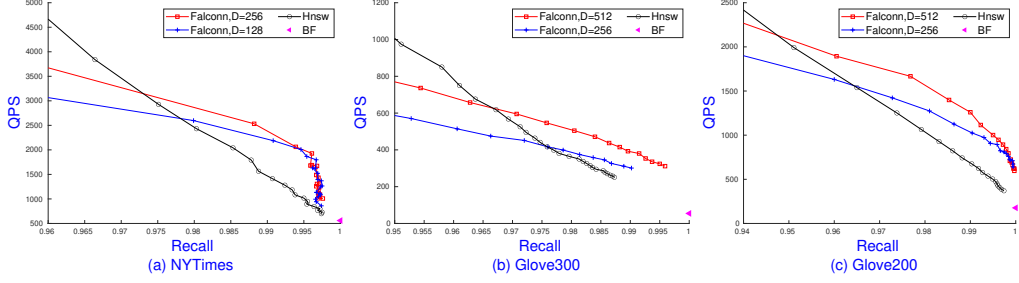

Figure 2: The recall-speed comparison between Falconn++ and HNSW with various  $D$ .

$n = 2M$ , we set  $L = 900$ ,  $D = \{256, 512\}$ ,  $iProbes = \{1, 4\}$ . On all 3 data sets, the first setting of  $D$  and  $iProbes$  lead to similar memory footprints of HNSW. The second setting increases the indexing space to approximately 4 times since we double  $D$ .

Regarding  $\alpha$ , given the scaling limit trick, we set  $\alpha = 0.01$  to reduce large buckets without affecting the performance. We observe that  $\alpha = \{0.01, \dots, 0.1\}$  gives the best performance without dramatically changing the indexing size.

#### 4 Comparison between Falconn++ and HnswLib on different top- $k$ values on Glove200

Figure 3 shows the recall-speed tradeoffs between Falconn++ and HNSW on several values of  $k = \{1, 5, 10, \dots, 100\}$  on Glove200 with  $L = 350$ ,  $D = 256$ ,  $iProbes = 3$ ,  $\alpha = 0.01$ . Since we apply the limit scaling trick to keep  $\max(k, \alpha B / iProbes)$  points in any bucket, Falconn++ does not work well on small  $k = \{1, 5, 10\}$ , compared to HNSW in Figure 3(a). This is due to the fact that many high quality candidates in a bucket are filtered away with  $\alpha = 0.01$ . However, Falconn++ can beat HNSW for larger  $k$ , i.e. at recall ratio of 0.95 for  $k \geq 60$  and at recall ratio of 0.96 for  $20 \leq k \leq 50$  in Figure 3(b) and (c).

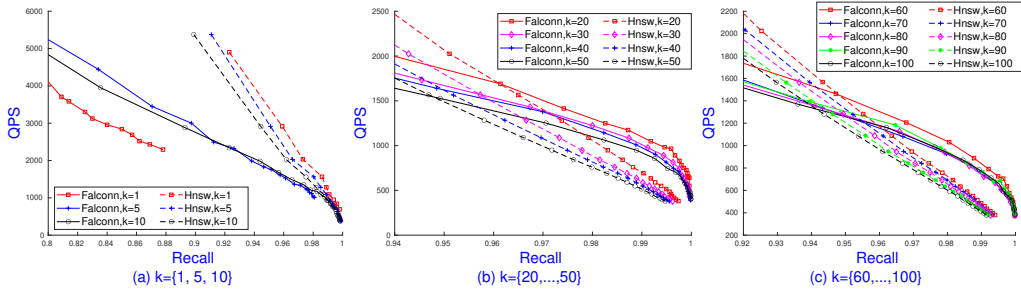

Figure 3: The recall-speed comparison between Falconn++ and Hnsw on different  $k$  with the scaling limit  $\max(k, \alpha B / iProbes)$ .

To deal with small  $k$ , we set the limit scaling to  $\max(\kappa, \alpha B / iProbes)$  where  $\kappa = 20$  to maintain enough high quality candidates in a bucket without affecting indexing time and space (see in Table 1 for  $k = \{1, 5, 10\}$ ). Figure 4 shows that Falconn++ with the setting of  $\max(20, \alpha B / iProbes)$  is competitive with HNSW at recall ratio of 0.93 for  $k = 1$ , and recall ratio of 0.96 for  $k = \{5, 10\}$  given the same indexing size.

#### 5 Comparison between Falconn++ and other state-of-the-art ANNS solvers

This section will give a comprehensive comparison between Falconn++ with other state-of-the-art ANNS solvers, including ScaNN [4], Faiss [5], and coCEOs [7] on high search recall regimes on three real-world data sets, including NYTimes, Glove200, and Glove300. The detailed data sets are

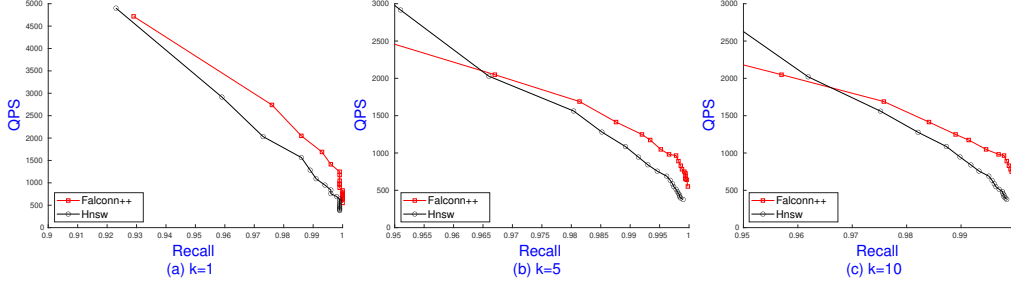

Figure 4: The recall-speed comparison between Falconn++ and Hnsw on different  $k$  with the scaling limit  $\max(20, \alpha B/iProbes)$ .

on Table 3. For ScaNN, we use the latest version 1.2.6 released on 29 April, 2022.<sup>1</sup> For FAISS, we use the latest version Faiss-CPU 1.7.2 released on 11 January, 2022.<sup>2</sup> For coCEOs, we use the latest released source code.<sup>3</sup> We note that ScaNN does not support multi-threading while Falconn++, FAISS and coCEOs do though their thread-scaling is not perfect.

**Parameter settings of Falconn++.** Since Falconn++ uses 2 concatenating cross-polytope LSH functions and  $D$  random projections, there are  $4D^2$  number of buckets in a hash table. Since we focus on  $k = 20$ , we set  $D = 2^b$  where  $b \approx \lceil \log_2(n/k) \rceil / 2$  to expect that each bucket has roughly  $k$  points. Hence, we use  $D = \{128, 256, 256\}$  for NYTimes, Glove300, and Glove200, respectively. This setting corresponds to  $\{2^{16}, 2^{18}, 2^{18}\}$  buckets in a hash table on three data sets. Note that the setting of  $D$  is proportional to the size of the data sets. The hash function is evaluated in  $\mathcal{O}(D \log D)$  time, so it does not dominate the query time. Furthermore, these values of  $D$  are large enough to ensure the asymptotic CEOs property.

We note that Falconn++ with the heuristics of centering the data and limit scaling make the bucket size smaller and more balancing. We observe that different small values of  $\alpha$  does not change the size of Falconn++ index. Hence, to maximize the performance of Falconn++, we set  $\alpha = 0.01$ . For the

<sup>1</sup><https://github.com/google-research/google-research/tree/master/scann>

<sup>2</sup><https://github.com/facebookresearch/faiss>

<sup>3</sup><https://github.com/NinhPham/MIPS>

Table 1: Hnsw takes **13.7 mins** to build 5.4GB indexing space. Falconn++ takes **1.1 mins** and needs different memory footprints dependent on  $k$ . For  $k \leq 10$ , we use  $\max(20, \alpha B/iProbes)$ . For  $k \geq 20$ , we use  $\max(k, \alpha B/iProbes)$ .

| $k$       | 1     | 5     | 10    | 20    | 30    | 40    | 50    | 60 – 100 |
|-----------|-------|-------|-------|-------|-------|-------|-------|----------|
| Falconn++ | 5.3GB | 5.3GB | 5.3GB | 5.3GB | 5.8GB | 6.0GB | 6.1GB | 6.2GB    |

Table 2: Indexing space and time comparison between Falconn++ and HNSW on 3 data sets.

| Algorithms | NYTimes |                 | Glove300 |                 | Glove200 |                 |
|------------|---------|-----------------|----------|-----------------|----------|-----------------|
|            | Space   | Time            | Space    | Time            | Space    | Time            |
| Hnsw       | 2.5 GB  | 7.8 mins        | 10.9 GB  | 26.7 mins       | 5.4 GB   | 13.7 mins       |
| Falconn++  | 2.7 GB  | <b>0.6 mins</b> | 10.8 GB  | <b>5.4 mins</b> | 5.3 GB   | <b>1.1 mins</b> |

Table 3: Data sets.

|     | NYTimes | Glove300  | Glove200  |
|-----|---------|-----------|-----------|
| $n$ | 290,000 | 2,196,017 | 1,183,514 |
| $d$ | 256     | 300       | 200       |

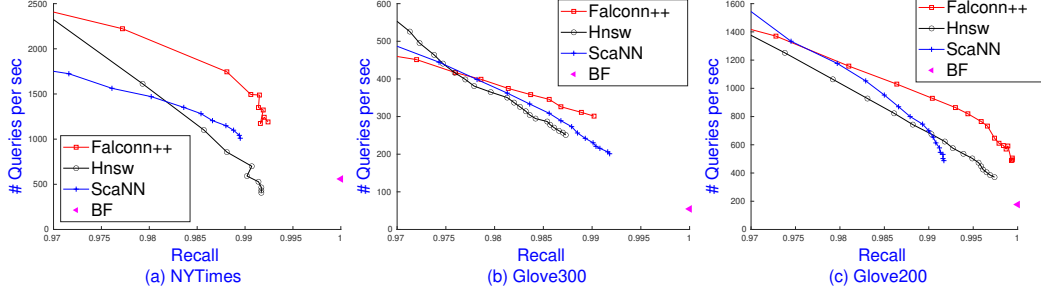

Figure 5: The recall-speed comparison between Falconn++, HNSW, and ScaNN on 3 data sets.

sake of comparison, we first select optimal parameter settings for HNSW [6] to achieve high search recall ratios given a reasonable query time. Based on the size of HNSW’s index, we tune the number of hash tables  $L$  for Falconn++ to ensure that Falconn++ shares a similar indexing size with HNSW but builds significantly faster, as can be seen in Table 2. In particular, we use  $L = 500, iProbes = 10$  for NYTimes,  $L = 900, iProbes = 1$  for Glove300, and  $L = 350, iProbes = 3$  for Glove200. Since the characteristics of the data sets are different, it uses different values of  $iProbes$ .

**Parameter settings of HNSW.** We first fix  $ef\_index = 200$  and increase  $M$  from 32 to 1024 to get the best recall-speed tradeoff. Then, we choose  $M = \{1024, 512, 256\}$  for NYTimes, Glove300, and Glove200, respectively. We observe that changing  $ef\_index$  while building the index does not improve the recall-speed tradeoff. We vary  $ef\_query = \{100, \dots, 2000\}$  to get the recall ratios and running time.

**Parameter settings of ScaNN.** We used the suggested parameter provided in ScaNN’s GitHub. We use *all* points to train ScaNN model with  $num\_leaves = 1000$  and  $score\_ah(2, anisotropic\_quantization\_threshold = 0.2)$ . For querying, we use  $pre\_reorder\_num\_neighbors = 500$  and vary  $leaves\_to\_search \in \{50, \dots, 1000\}$  to get the recall ratios and running time.

**Parameter settings of FAISS.** We compare with Faissee.IndexIVFPQ and set the sub-quantizers  $m = d, nlist = 1000$ , and 8 bits for each centroid. We again use *all* points to train FAISS. We observe that  $m < d$  or increasing  $nlist$  returns lower recall-speed tradeoffs. We vary  $probe \in \{50, \dots, 1000\}$  to get the recall ratios and running time.

**Parameter settings of coCEOs.** We use  $D = 1024$  and  $SamplingSize = n, s_0 = 20$ , and vary the number of candidates from 10,000 to 100,000 to get the recall ratios and running time.

**Comparison of recall-speed tradeoffs.** Figure 5 shows that Falconn++, though lacking many important optimized routines, achieves higher recall-speed tradeoffs when  $recall > 0.97$  compared to both HNSW and ScaNN on all three data sets. We emphasize that the speed of ScaNN and HNSW comes from several optimized routines, including pre-fetching instructions, SIMD in-register lookup tables [1] for faster distance computation, and optimized multi-threading primitives. Compared to HNSW and ScaNN, both FalconnLib and Falconn++ simply use the Eigen library to support SIMD vectorization for computing inner products.

Figure 6 and 7 shows that Falconn++ achieves higher recall-speed tradeoffs than both FAISS and coCEOs over a wide range of recall ratios. Since coCEOs is designed for maximum inner product search, its performance is inferior to other ANNS solvers for angular distance.

## References

- [1] Fabien André, Anne-Marie Kermarrec, and Nicolas Le Scouarnec. Quicker ADC : Unlocking the hidden potential of product quantization with SIMD. *IEEE Trans. Pattern Anal. Mach. Intell.*, 43(5):1666–1677, 2021.

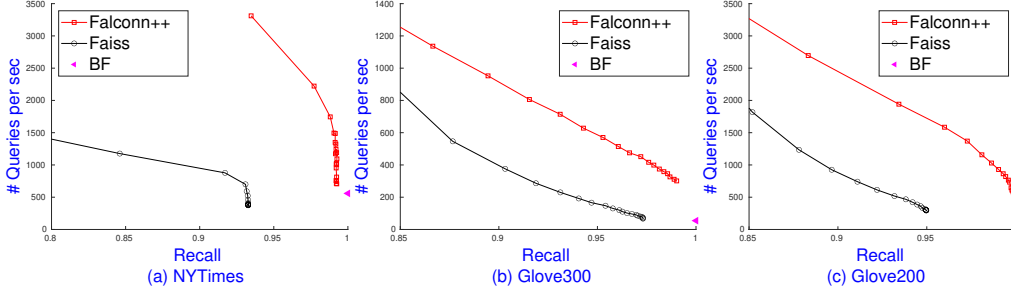

Figure 6: The recall-speed comparison between Falconn++ and FAISS on 3 data sets.

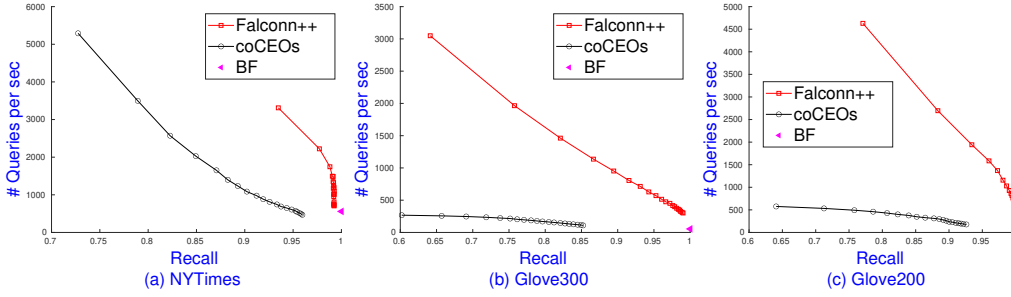

Figure 7: The recall-speed comparison between Falconn++ and coCEOs on 3 data sets.

- [2] Anja Becker, Léo Ducas, Nicolas Gama, and Thijs Laarhoven. New directions in nearest neighbor searching with applications to lattice sieving. In *SODA*, pages 10–24, 2016.
- [3] Tobias Christiani. A framework for similarity search with space-time tradeoffs using locality-sensitive filtering. In *SODA*, pages 31–46, 2017.
- [4] Ruiqi Guo, Philip Sun, Erik Lindgren, Quan Geng, David Simcha, Felix Chern, and Sanjiv Kumar. Accelerating large-scale inference with anisotropic vector quantization. In *ICML*, volume 119, pages 3887–3896, 2020.
- [5] Faiss Library. Faiss. <https://faiss.ai/>.
- [6] Yu A Malkov and Dmitry A Yashunin. Efficient and robust approximate nearest neighbor search using hierarchical navigable small world graphs. *IEEE transactions on pattern analysis and machine intelligence*, 42(4):824–836, 2018.
- [7] Ninh Pham. Simple yet efficient algorithms for maximum inner product search via extreme order statistics. In *KDD*, pages 1339–1347, 2021.
